# Supplementary material for: The effect of PEG functionalization on the in vivo behavior and toxicity of CdTe quantum dots
Source: Royal Society of Chemistry journal article supplement (doi:10.1039/c9ra00022d), 2019-01-01
Supplement: c9ra00022d1.pdf [file c9ra00022d1.pdf]

**Supporting Information:**

**PEG Effect on in Vivo Behavior and Toxicity of CdTe Quantum  
Dots**

Yan Du <sup>1†</sup>, Jingjing Dong <sup>1†</sup>, Yuanyuan Zhong<sup>1</sup>, Chuntong Qian<sup>1</sup>, Shian Sun<sup>3</sup>, Liping  
Gao<sup>4</sup>, Dongzhi Yang<sup>1,2\*</sup>

<sup>1</sup> Jiangsu Key Laboratory of New Drug Research and Clinical Pharmacy, Xuzhou  
Medical University, Xuzhou, Jiangsu 221004, China

<sup>2</sup> Department of Pharmaceutical Analysis, Xuzhou Medical University, Xuzhou,  
Jiangsu 221004, China

<sup>3</sup> Xuzhou Air Force College, Xuzhou, Jiangsu 221000, China

<sup>4</sup> Xuzhou Cancer Hospital, Xuzhou, Jiangsu 221000, China

\* (D.Y.) Tel: 86-516-63262138; E-mail: [dongzhiy@xzhmu.edu.cn](mailto:dongzhiy@xzhmu.edu.cn)

† These authors contributed equally to this work

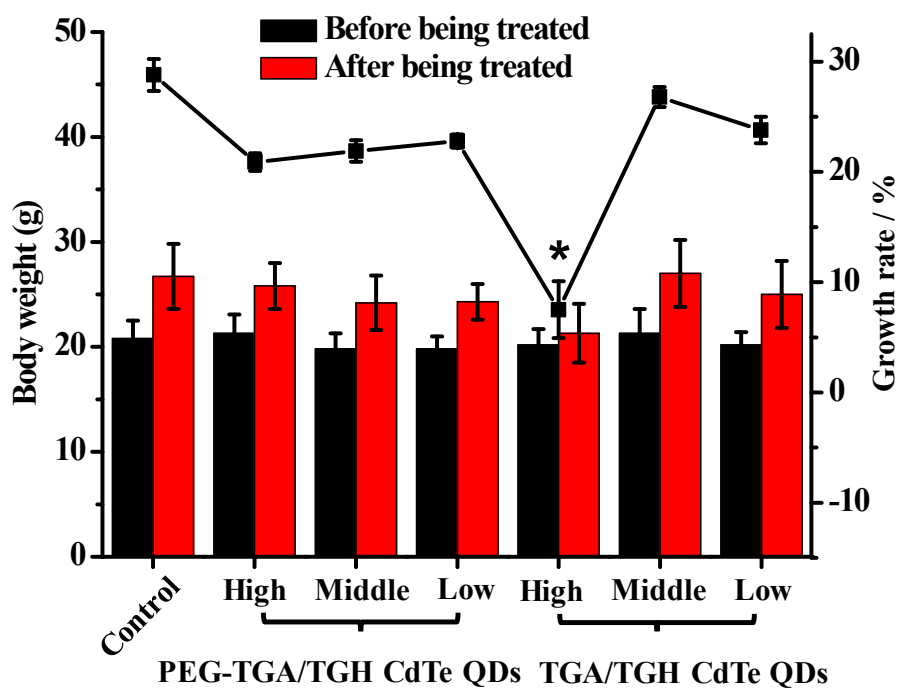

Fig. S1 Body weight variation of mice post-treatment of QDs

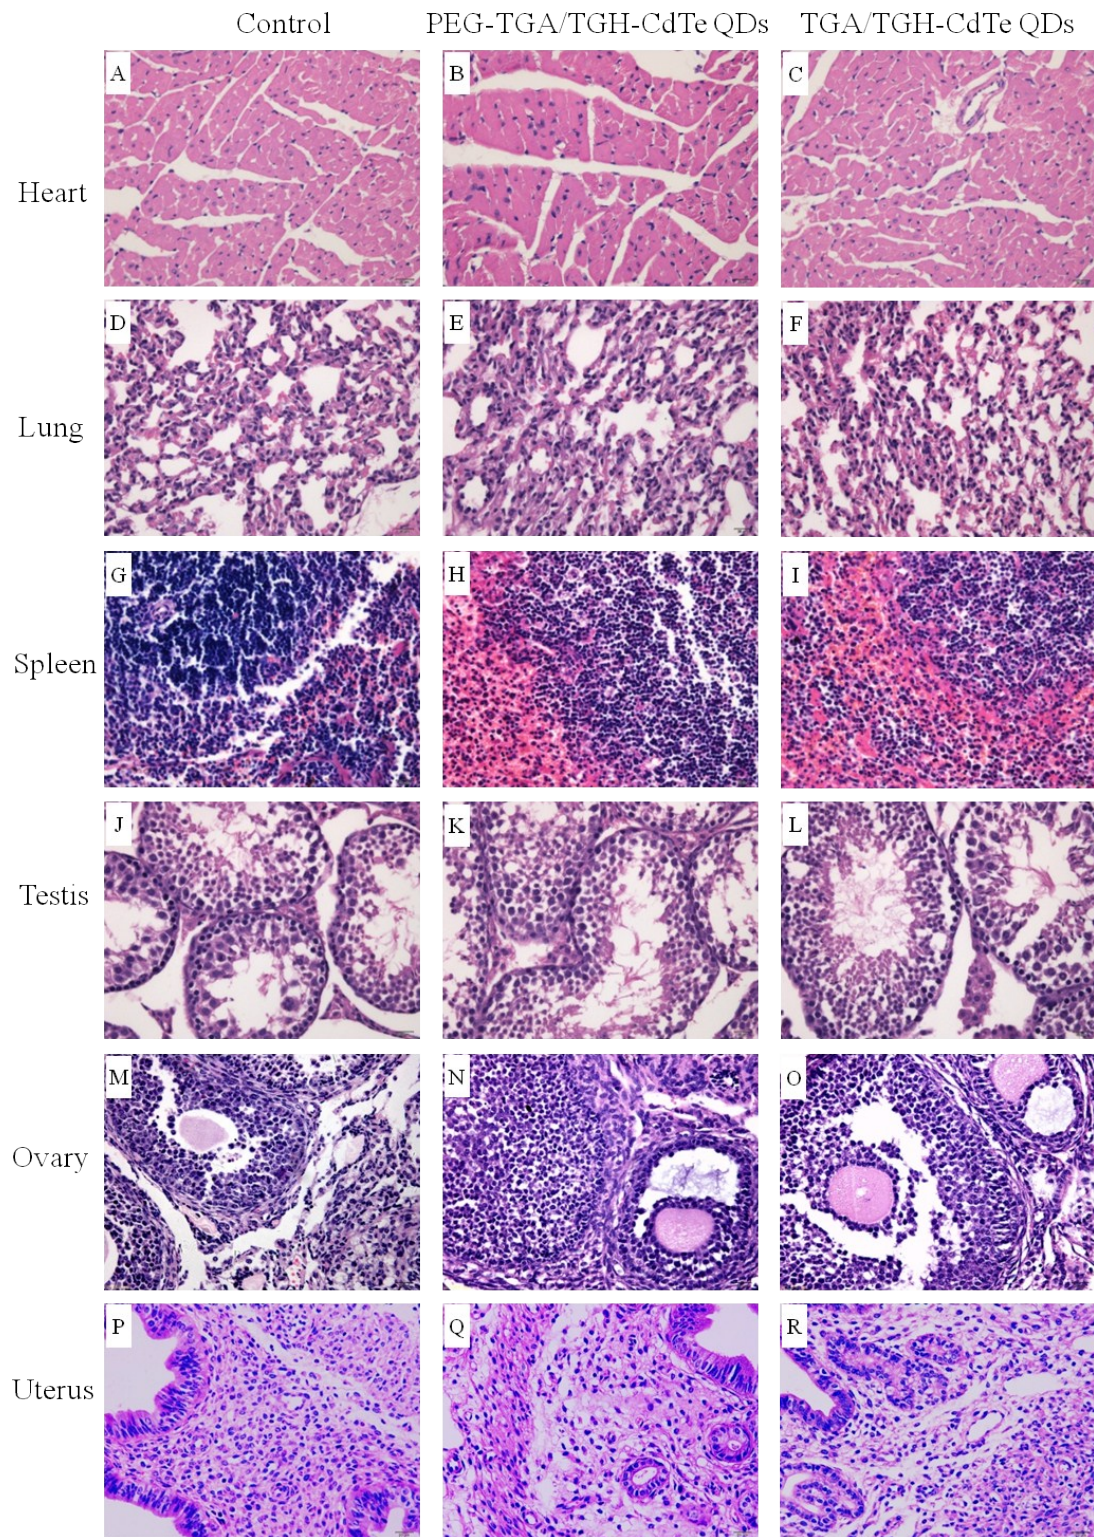

Fig. S2 H&E staining of heart, lung, spleen, testis, ovary and uterus treated by TGA/TGH-CdTe QDs and PEG-TGA/TGH-CdTe QDs
